# Supplementary material for: Genetic Alterations of Chromosome 8 Genes in Oral Cancer
Source: PubMed Central journal article supplement — Sci Rep. 2014 Aug 15;4:6073. doi: 10.1038/srep06073 (PMC4133705; doi:10.1038/srep06073), 2014-08-15
Supplement: srep06073-s1.pdf [file srep06073-s1.pdf]

## **Genetic Alterations of Chromosome 8 Genes in Oral Cancer**

Zachary Wei Ern Yong<sup>1,2</sup>, Zuraiza Mohamad Zaini<sup>1,2</sup>, Thomas George Kallarakkal<sup>1,2</sup>, Lee Peng Karen-Ng<sup>2</sup>, Zainal Ariff Abdul Rahman<sup>1,2</sup>, Siti Mazlipah Ismail<sup>1,2</sup>, Noor Akmal Sharifah<sup>3</sup>, Wan Mahadzir Wan Mustafa<sup>4</sup>, Mannil Thomas Abraham<sup>5</sup>, Keng Kiong Tay<sup>6</sup>, Rosnah Binti Zain<sup>1,2,\*</sup>

<sup>1</sup>Department of Oro-Maxillofacial Surgical and Medical Sciences, Faculty of Dentistry, University of Malaya, Kuala Lumpur, Malaysia; <sup>2</sup>Oral Cancer Research & Coordinating Centre (OCRCC), Faculty of Dentistry, University of Malaya, Kuala Lumpur, Malaysia; <sup>3</sup>Department of Pathology, Universiti Kebangsaan Malaysia Medical Centre, Kuala Lumpur; <sup>4</sup>Department of Oral Surgery, Hospital Kuala Lumpur, 50588 Kuala Lumpur, Malaysia; <sup>5</sup>Department of Oral and Maxillofacial Surgery, Hospital Tengku Ampuan Rahimah, Klang, Malaysia; <sup>6</sup>Oral Surgery Clinic, Hospital Umum Sarawak, Kuching, Malaysia;

\*Corresponding author:

Rosnah Binti Zain  
Oral Cancer Research & Coordinating Centre,  
7th floor, Postgraduate & Research Tower,  
Faculty of Dentistry, University of Malaya  
50603 Kuala Lumpur, Malaysia  
Tel: +60379674896  
Fax: +60379547301  
E-mail address: rosnahbz12@yahoo.com

Supplementary Table S1

| Genes                         | Location     | Regions                                                                              | Chromosome Arm                                                                 |
|-------------------------------|--------------|--------------------------------------------------------------------------------------|--------------------------------------------------------------------------------|
| <b>MFHAS1</b>                 | 8p23.1       | 8p23 <sup>1-4</sup> ,<br>Associations:<br>Metastasis, poor<br>prognosis <sup>4</sup> | 8p <sup>5-9</sup><br><br>Associations:<br>Lymph node metastasis <sup>8</sup>   |
| <b>MSRA</b>                   | 8p23.1       |                                                                                      |                                                                                |
| <b>GATA4</b>                  | 8p23.1-p22   |                                                                                      |                                                                                |
| <b>DLGAP2</b>                 | 8p23         |                                                                                      |                                                                                |
| <b>CTSB</b>                   | 8p22         | 8p22 <sup>3,10,11</sup>                                                              |                                                                                |
| <b>TUSC3</b>                  | 8p22         |                                                                                      |                                                                                |
| <b>CSGALNACT1</b>             | 8p21.3       | 8p21 <sup>2,11</sup>                                                                 | 8p12-p21 <sup>3</sup> ;<br>8p11-8p12 <sup>12</sup>                             |
| <b>FGFR1<sup>13</sup></b>     | 8p12         | 8p12 <sup>10</sup>                                                                   |                                                                                |
| <b>PRKDC</b>                  | 8p11         | -                                                                                    |                                                                                |
| <b>MOS</b>                    | 8q11         | -                                                                                    | 8q <sup>5-9</sup><br><br>Associations:<br>Lymph node metastasis <sup>5</sup> , |
| <b>CHD7</b>                   | 8q12.2       | -                                                                                    |                                                                                |
| <b>NCOA2</b>                  | 8q13.3       | -                                                                                    |                                                                                |
| <b>TPD52</b>                  | 8q21         | -                                                                                    |                                                                                |
| <b>E2F5</b>                   | 8q21.2       | -                                                                                    |                                                                                |
| <b>MYBL1</b>                  | 8q22         | -                                                                                    |                                                                                |
| <b>RAD54B</b>                 | 8q22.1       | -                                                                                    |                                                                                |
| <b>ST7</b>                    | 8q22.2       | -                                                                                    |                                                                                |
| <b>EIF3E</b>                  | 8q22-q23     | -                                                                                    |                                                                                |
| <b>RNF139</b>                 | 8q24         | 8q24 <sup>14</sup> ;<br>8q23-ter <sup>12</sup>                                       |                                                                                |
| <b>KCNQ3</b>                  | 8q24         |                                                                                      |                                                                                |
| <b>SLA</b>                    | 8q24         |                                                                                      |                                                                                |
| <b>EIF3H</b>                  | 8q24.11      |                                                                                      |                                                                                |
| <b>EXT1</b>                   | 8q24.11      |                                                                                      |                                                                                |
| <b>ASAP1</b>                  | 8q24.1-q24.2 |                                                                                      |                                                                                |
| <b>KHDRBS3</b>                | 8q24.2       |                                                                                      |                                                                                |
| <b>MYC<sup>13,15,16</sup></b> | 8q24.21      |                                                                                      |                                                                                |
| <b>KCNK9</b>                  | 8q24.3       |                                                                                      |                                                                                |
| <b>PTK2<sup>17</sup></b>      | 8q24.3       |                                                                                      |                                                                                |
| <b>PTP4A3</b>                 | 8q24.3       |                                                                                      |                                                                                |
| <b>RECQL4</b>                 | 8q24.3       |                                                                                      |                                                                                |

- Ishwad, C. S. *et al.* Frequent allelic loss and homozygous deletion in chromosome band 8p23 in oral cancer. *Int J Cancer* **80**, 25-31 (1999).
- Sunwoo, J. B., Holt, M. S., Radford, D. M., Deeker, C. & Scholnick, S. B. Evidence for multiple tumor suppressor genes on chromosome arm 8p in supraglottic laryngeal cancer. *Genes Chromosomes Cancer* **16**, 164-169, doi:10.1002/(SICI)1098-2264(199607)16:3<164::AID-GCC2>3.0.CO;2-X (1996).
- Wu, C. L. *et al.* Deletion mapping defines three discrete areas of allelic imbalance on chromosome arm 8p in oral and oropharyngeal squamous cell carcinomas. *Genes Chromosomes Cancer* **20**, 347-353 (1997).
- Bockmuhl, U., Ishwad, C. S., Ferrell, R. E. & Gollin, S. M. Association of 8p23 deletions with poor survival in head and neck cancer. *Otolaryngology--head and neck surgery : official journal of American Academy of Otolaryngology-Head and Neck Surgery* **124**, 451-455, doi:10.1067/mhn.2001.114794 (2001).
- Yoshioka, S. *et al.* Genomic profiling of oral squamous cell carcinoma by array-based comparative genomic hybridization. *PLoS One* **8**, e56165, doi:10.1371/journal.pone.0056165 (2013).
- Vincent-Chong, V. K. *et al.* Genome-wide analysis of oral squamous cell carcinomas revealed over expression of ISG15, Nestin and WNT11. *Oral Dis* **18**, 469-476, doi:10.1111/j.1601-0825.2011.01894.x (2012).
- Zhou, X. *et al.* Allelic imbalance analysis of oral tongue squamous cell carcinoma by high-density single nucleotide polymorphism arrays using whole-genome amplified DNA. *Human genetics* **118**, 504-507, doi:10.1007/s00439-005-0069-x (2005).
- Pathare, S., Schaffer, A. A., Beerenwinkel, N. & Mahimkar, M. Construction of oncogenetic tree models reveals multiple pathways of oral cancer progression. *Int J Cancer* **124**, 2864-2871, doi:10.1002/ijc.24267 (2009).
- Sparano, A. *et al.* Genome-wide profiling of oral squamous cell carcinoma by array-based comparative genomic hybridization. *Laryngoscope* **116**, 735-741, doi:10.1097/01.mlg.0000205141.54471.7f (2006).
- Ono, K. *et al.* Allelic loss on the short arm of chromosome 8 in oral squamous cell carcinoma. *Oncol Rep* **6**, 785-789 (1999).
- El-Naggar, A. K. *et al.* Localization of chromosome 8p regions involved in early tumorigenesis of oral and laryngeal squamous carcinoma. *Oncogene* **16**, 2983-2987, doi:10.1038/sj.onc.1201808 (1998).
- Freier, K. *et al.* Cytogenetic characterization of head and neck squamous cell carcinoma cell lines as model systems for the functional analyses of tumor-associated genes. *J Oral Pathol Med* **39**, 382-389, doi:10.1111/j.1600-0714.2009.00864.x (2010).
- Freier, K. *et al.* Recurrent FGFR1 amplification and high FGFR1 protein expression in oral squamous cell carcinoma (OSCC). *Oral Oncol* **43**, 60-66, doi:10.1016/j.oraloncology.2006.01.005 (2007).
- Freier, K. *et al.* Recurrent copy number gain of transcription factor SOX2 and corresponding high protein expression in oral squamous cell carcinoma. *Genes Chromosomes Cancer* **49**, 9-16, doi:10.1002/gcc.20714 (2010).
- Martin-Ezquerria, G. *et al.* Multiple genetic copy number alterations in oral squamous cell carcinoma: study of MYC, TP53, CCDN1, EGFR and ERBB2 status in primary and metastatic tumours. *The British journal of dermatology* **163**, 1028-1035, doi:10.1111/j.1365-2133.2010.09947.x (2010).
- Chen, Y. J. *et al.* Genome-wide profiling of oral squamous cell carcinoma. *J Pathol* **204**, 326-332, doi:10.1002/path.1640 (2004).
- Ribeiro, I. P. *et al.* Genetic imbalances detected by multiplex ligation-dependent probe amplification in a cohort of patients with oral squamous cell carcinoma-the first step towards clinical personalized medicine. *Tumour Biol* **35**, 4687-4695, doi:10.1007/s13277-014-1614-9 (2014).
